# Supplementary material for: Effects of Coconut Oil and Palm Oil on Growth, Rumen Microbiota, and Fatty Acid Profile of Suckling Calves
Source: MDPI journal article supplement (doi:10.3390/microorganisms11030655), 2023-03-03
Supplement: s1 [file s1]

**Table S1** Nutrition levels, and fatty acid composition of MRs

| Items                                    | MR <sup>1</sup> |      |       |
|------------------------------------------|-----------------|------|-------|
|                                          | CON             | CCO  | PLO   |
| Nutrition, g/kg DM <sup>2</sup>          |                 |      |       |
| CP                                       | 254             | 259  | 252   |
| EE                                       | 127             | 125  | 122   |
| Ash                                      | 64              | 63   | 64    |
| Ca                                       | 14              | 14   | 14    |
| P                                        | 13              | 13   | 13    |
| ME, Mcal/kg                              | 4.82            | 4.80 | 4.87  |
| Main fatty acids, g/100g MR <sup>3</sup> |                 |      |       |
| C12:0                                    | 0.55            | 4.90 | 0.04  |
| C14:0                                    | 1.53            | 2.00 | 0.17  |
| C16:0                                    | 4.15            | 1.22 | 6.72  |
| C18:0                                    | 1.33            | 0.41 | 0.74  |
| C18:1                                    | 2.33            | 0.95 | 4.19  |
| C18:2, n-6                               | 0.10            | 0.23 | 0.98  |
| MCFAs                                    | 1.14            | 6.24 | 0.06  |
| LCFAs                                    | 10.13           | 4.84 | 12.94 |
| SFAs                                     | 2.88            | 1.19 | 5.22  |
| UFAs                                     | 7.84            | 4.99 | 7.74  |
| MUFAs                                    | 2.68            | 0.96 | 4.23  |
| PUFAs                                    | 0.19            | 0.23 | 1.00  |

<sup>1</sup>MR=milk replacer; CON, only whole milk powder as fat source of MR; CCO, only coconut oil powder as fat sources of MR; PLO, only palm oil powder as fat sources of MR.

<sup>2</sup>DM = dry matter; CP = crude protein; EE = ether extract; NDF = neutral detergent fiber; ADF = acid detergent; Ca = calcium; P = total phosphate.

<sup>3</sup> MCFAs = total of medium-chain fatty acids (6- to 12-carbon FA); LCFAs = total of long-chain fatty acids (>12-carbon FA), SFAs= total of saturated fatty acids; UFAs = total of unsaturated fatty acids, MUFAs=total of monounsaturated fatty acids; PUFAs=total of polyunsaturated fatty acids.

**Table S2** The ingredient composition and nutrient profile of starter

| Ingredients, g/kg   | Content | Nutrients                   | Content |
|---------------------|---------|-----------------------------|---------|
| Extrude corn        | 100     | CP, g/kg DM                 | 236.3   |
| Wheat flour         | 45      | EE, g/kg DM                 | 49.8    |
| Soybean meal        | 250     | NDF, g/kg DM                | 165.6   |
| Extruded soybean    | 80      | ADF, g/kg DM                | 67.8    |
| Wheat bran          | 60      | Ash, g/kg DM                | 76.9    |
| Soybean molasses    | 70      | Ca, g/kg DM                 | 15.1    |
| DDGS                | 50      | P, g/kg DM                  | 9.6     |
| Glucose             | 20      | ME, <sup>2</sup> Mcal/kg DM | 4.50    |
| Dried whey powder   | 30      |                             |         |
| Limestone           | 22      |                             |         |
| CaHPO <sub>4</sub>  | 5       |                             |         |
| NaCl                | 8       |                             |         |
| Premix <sup>1</sup> | 10      |                             |         |

<sup>1</sup> The premix provided the following per kg of the starter: vitamin A 15 000 IU, vitamin D 5 000 IU, vitamin E 50 mg, Fe 90 mg, Cu 12.5 mg, Mn 60 mg, Zn 100 mg, Se 0.3 mg, I 1.0 mg, Co 0.5 mg.

<sup>2</sup> Calculated according to NRC (2001).

**Table S3** Effect of coconut oil or palm oil in MRs on rumen fermentation parameters of suckling calves

| Items <sup>1</sup>       | Treatment |       |       | SEM   | P-value |
|--------------------------|-----------|-------|-------|-------|---------|
|                          | CON       | CCO   | PLO   |       |         |
| pH                       | 6.60      | 6.31  | 6.39  | 0.082 | 0.349   |
| NH <sub>3</sub> -N, mg/L | 72.9      | 73.8  | 74.1  | 0.856 | 0.871   |
| Total VFA, mM            | 81.6      | 84.7  | 84.4  | 3.275 | 0.691   |
| Acetate, %               | 54.99     | 51.08 | 52.46 | 1.178 | 0.454   |
| Propionate, %            | 28.55     | 31.46 | 31.38 | 1.425 | 0.688   |
| Isobutyric, %            | 1.55      | 1.74  | 1.49  | 0.149 | 0.798   |
| Butyrate, %              | 7.67      | 7.36  | 7.33  | 0.458 | 0.956   |
| Isovaleric, %            | 3.27      | 3.95  | 3.26  | 1.309 | 0.723   |
| Valerate, %              | 3.97      | 4.41  | 4.08  | 0.155 | 0.560   |
| Acetate/Propionate ratio | 1.98      | 1.70  | 1.71  | 0.112 | 0.562   |

<sup>1</sup> NH<sub>3</sub>-N = ammonia; Total VFA = total volatile fatty acid.

**Table S4** Effect of coconut oil or palm oil in MRs on rumen digestive enzyme activities of suckling calves (per gram of true protein)

| Items <sup>1</sup>     | Treatments |      |      | SEM   | P-value |
|------------------------|------------|------|------|-------|---------|
|                        | CON        | CCO  | PLO  |       |         |
| $\alpha$ -amylase, U/g | 40.3       | 41.9 | 45.7 | 2.903 | 0.753   |
| Neutral protease, U/g  | 75.0       | 75.6 | 80.2 | 1.804 | 0.459   |
| CMCase, U/g            | 8.3        | 8.4  | 8.4  | 0.182 | 0.931   |
| Xylanase, U/g          | 17.6       | 17.2 | 17.2 | 0.631 | 0.959   |
| Lipases, U/g           | 15.3       | 15.6 | 15.1 | 0.453 | 0.876   |

<sup>1</sup> CMCase = carboxymethyl cellulose.

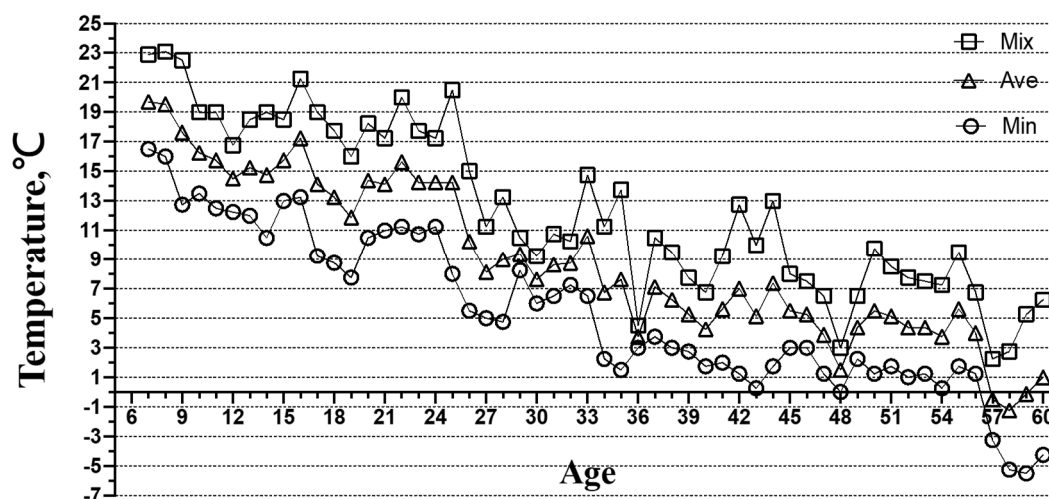**Figure S1.** The maximum (Max), average (Ave), and minimum (Min) ambient temperature the daily during the trial. The average temperature of 9°C, ranging from -5 ~ 23°C.

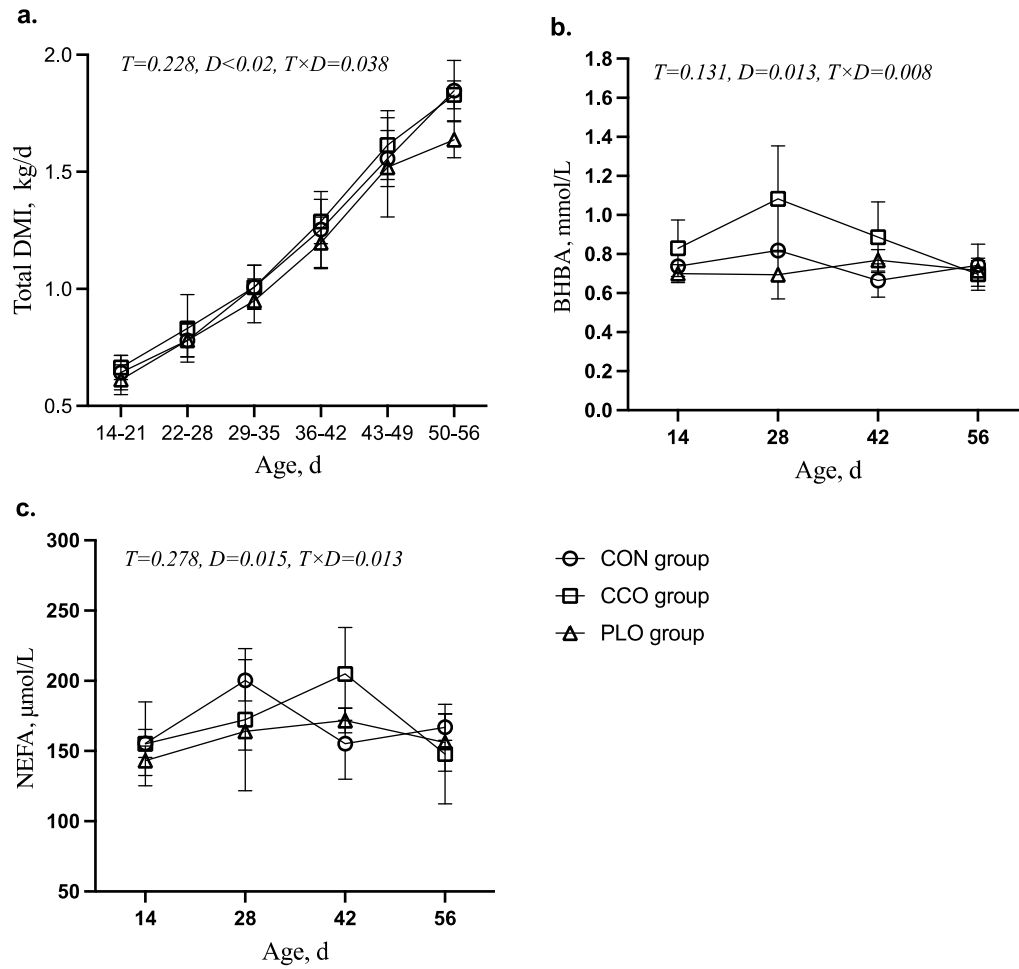

**Figure S2.** **a.** Effects of different sources of fat on total DMI in suckling calves; **b.** Effect of different sources of fat on concentrations of serum BHBA in suckling calves; **c.** Effect of different sources of fat on concentrations of serum NEFA in suckling calves;  $T = p$ -value of treatment,  $D = p$ -value of age,  $T \times D = p$ -value of interaction between treatment and age
